# Supplementary material for: Hypoxia-induced reactive oxygen species mediate N-cadherin and SERPINE1 expression, EGFR signalling and motility in MDA-MB-468 breast cancer cells
Source: PubMed Central journal article supplement (PMC5680275; doi:10.1038/s41598-017-15474-7), 2017-11-09
Supplement: 41598_2017_15474_MOESM1_ESM.pdf [file 41598_2017_15474_MOESM1_ESM.pdf]

## Hypoxia-induced reactive oxygen species mediate N-cadherin and SERPINE1 expression, EGFR signalling and motility in MDA-MB-468 breast cancer cells

Iman Azimi<sup>1,2,3,\*</sup>, Rosalie M. Petersen<sup>1</sup>, Erik W. Thompson<sup>3,4,5</sup>, Sarah J. Roberts-Thomson<sup>1</sup>, Gregory R. Monteith<sup>1,2,3</sup>

<sup>1</sup>School of Pharmacy, The University of Queensland, Brisbane, Queensland, Australia

<sup>2</sup>Mater Research Institute, The University of Queensland, Brisbane, Queensland, Australia

<sup>3</sup>Translational Research Institute, Brisbane, Queensland, Australia

<sup>4</sup>Institute of Health and Biomedical Innovation and School of Biomedical Sciences, Queensland University of Technology, Kelvin Grove, Queensland, Australia

<sup>5</sup>University of Melbourne Department of Surgery, St. Vincent's Hospital, Melbourne, Victoria, Australia

\* Corresponding author: Iman Azimi, Email address: [i.azimi@uq.edu.au](mailto:i.azimi@uq.edu.au)

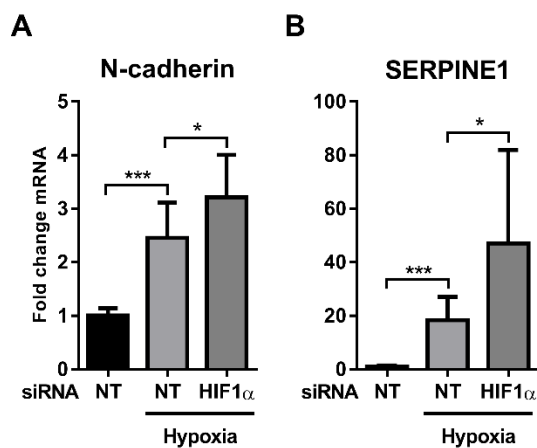

**Supplementary Figure S1.** The effect of HIF1 $\alpha$  silencing on the expression of N-cadherin and SERPINE1. The effect of siRNA-mediated HIF1 $\alpha$  silencing relative to non-targeting control (NT) on hypoxia-induced N-cadherin (A) and SERPINE1 (B) mRNA up-regulation (24 h hypoxia). \*  $p < 0.05$ , \*\*  $p < 0.001$  (one-way ANOVA, with Tukey's multiple comparisons test),  $n = 3 \pm \text{SD}$ .

**Fig. 1A**

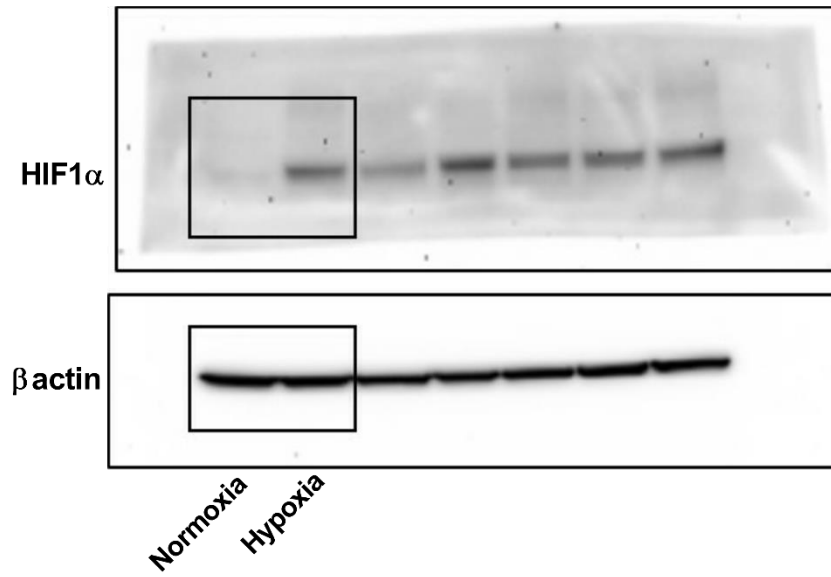

**Fig. 3A**

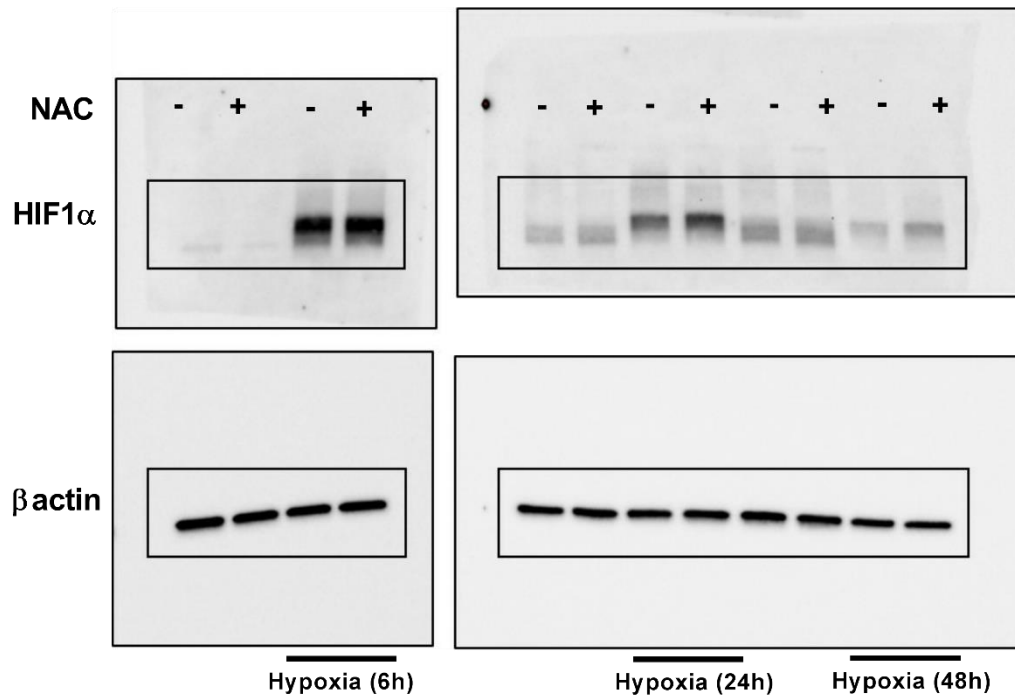

**Supplementary figure S2.** The full-length uncropped images of all immunoblots with indicated areas of selection highlighted in black.

**Fig. 3C**

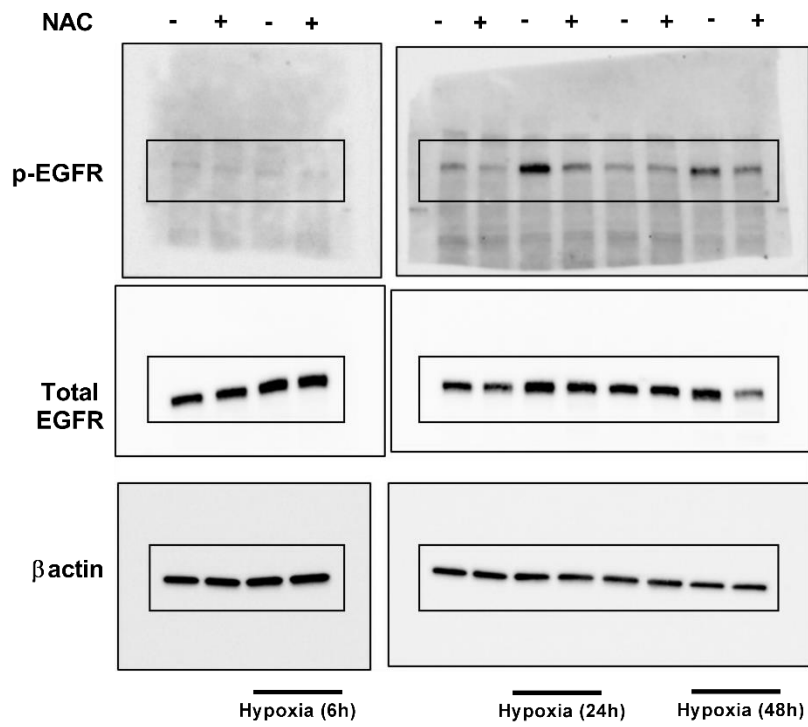

**Fig. 4C**

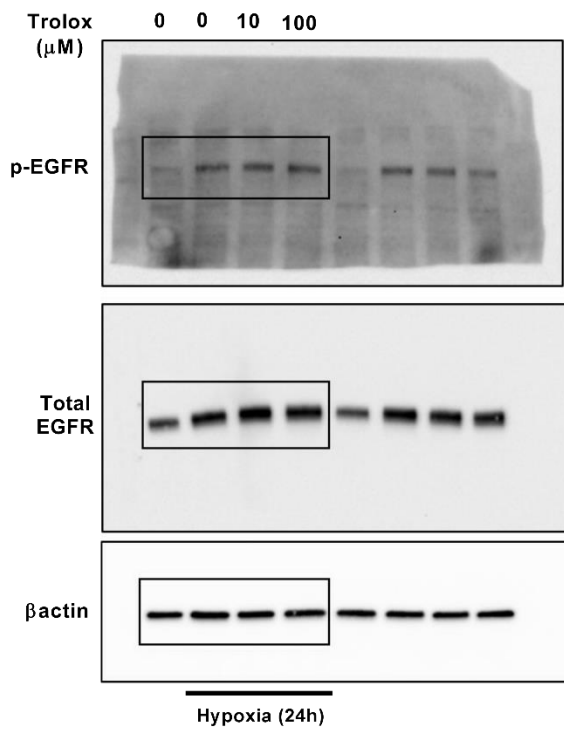

**Supplementary figure S2.** The full-length uncropped images of all immunoblots with indicated areas of selection highlighted in black.

**Fig. 4D**

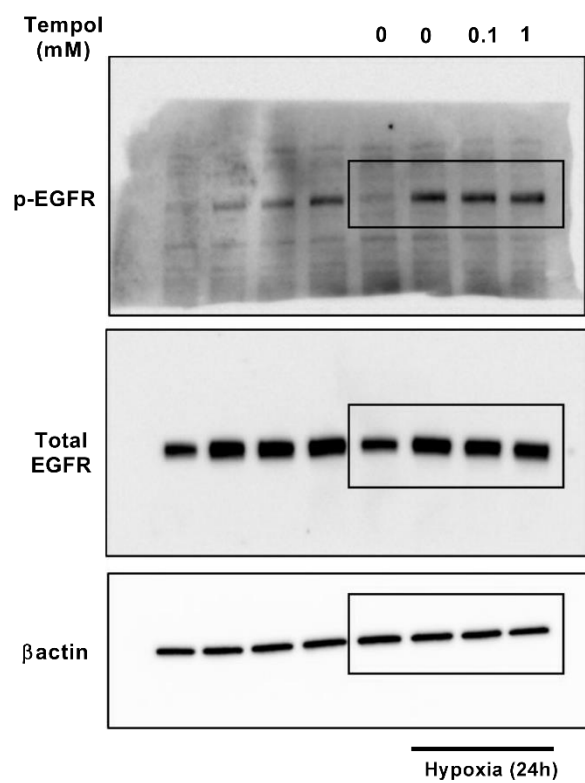

**Fig. 5C**

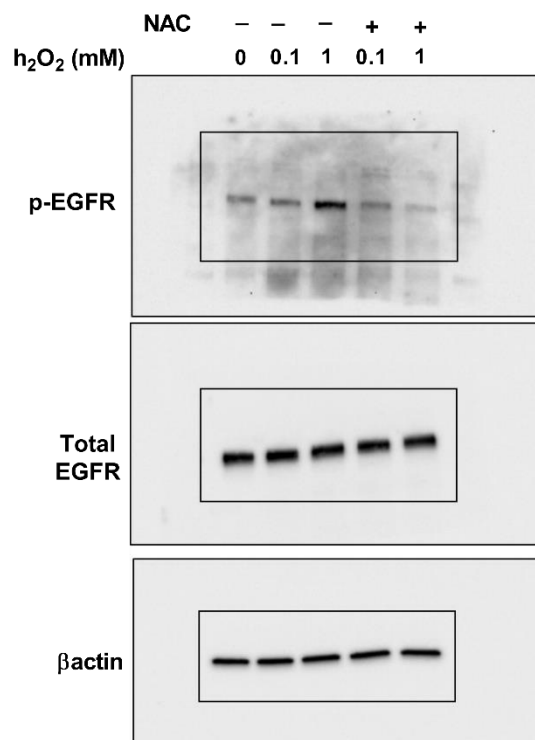

**Supplementary figure S2.** The full-length uncropped images of all immunoblots with indicated areas of selection highlighted in black.
